# Supplementary material for: Building financial management capacity for community ownership of development initiatives in rural Zambia
Source: PubMed Central journal article supplement (PMC7043374; doi:10.1002/hpm.2810), 2019-05-23
Supplement: HPM-35-36-s001.pdf [file HPM-35-36-s001.pdf]

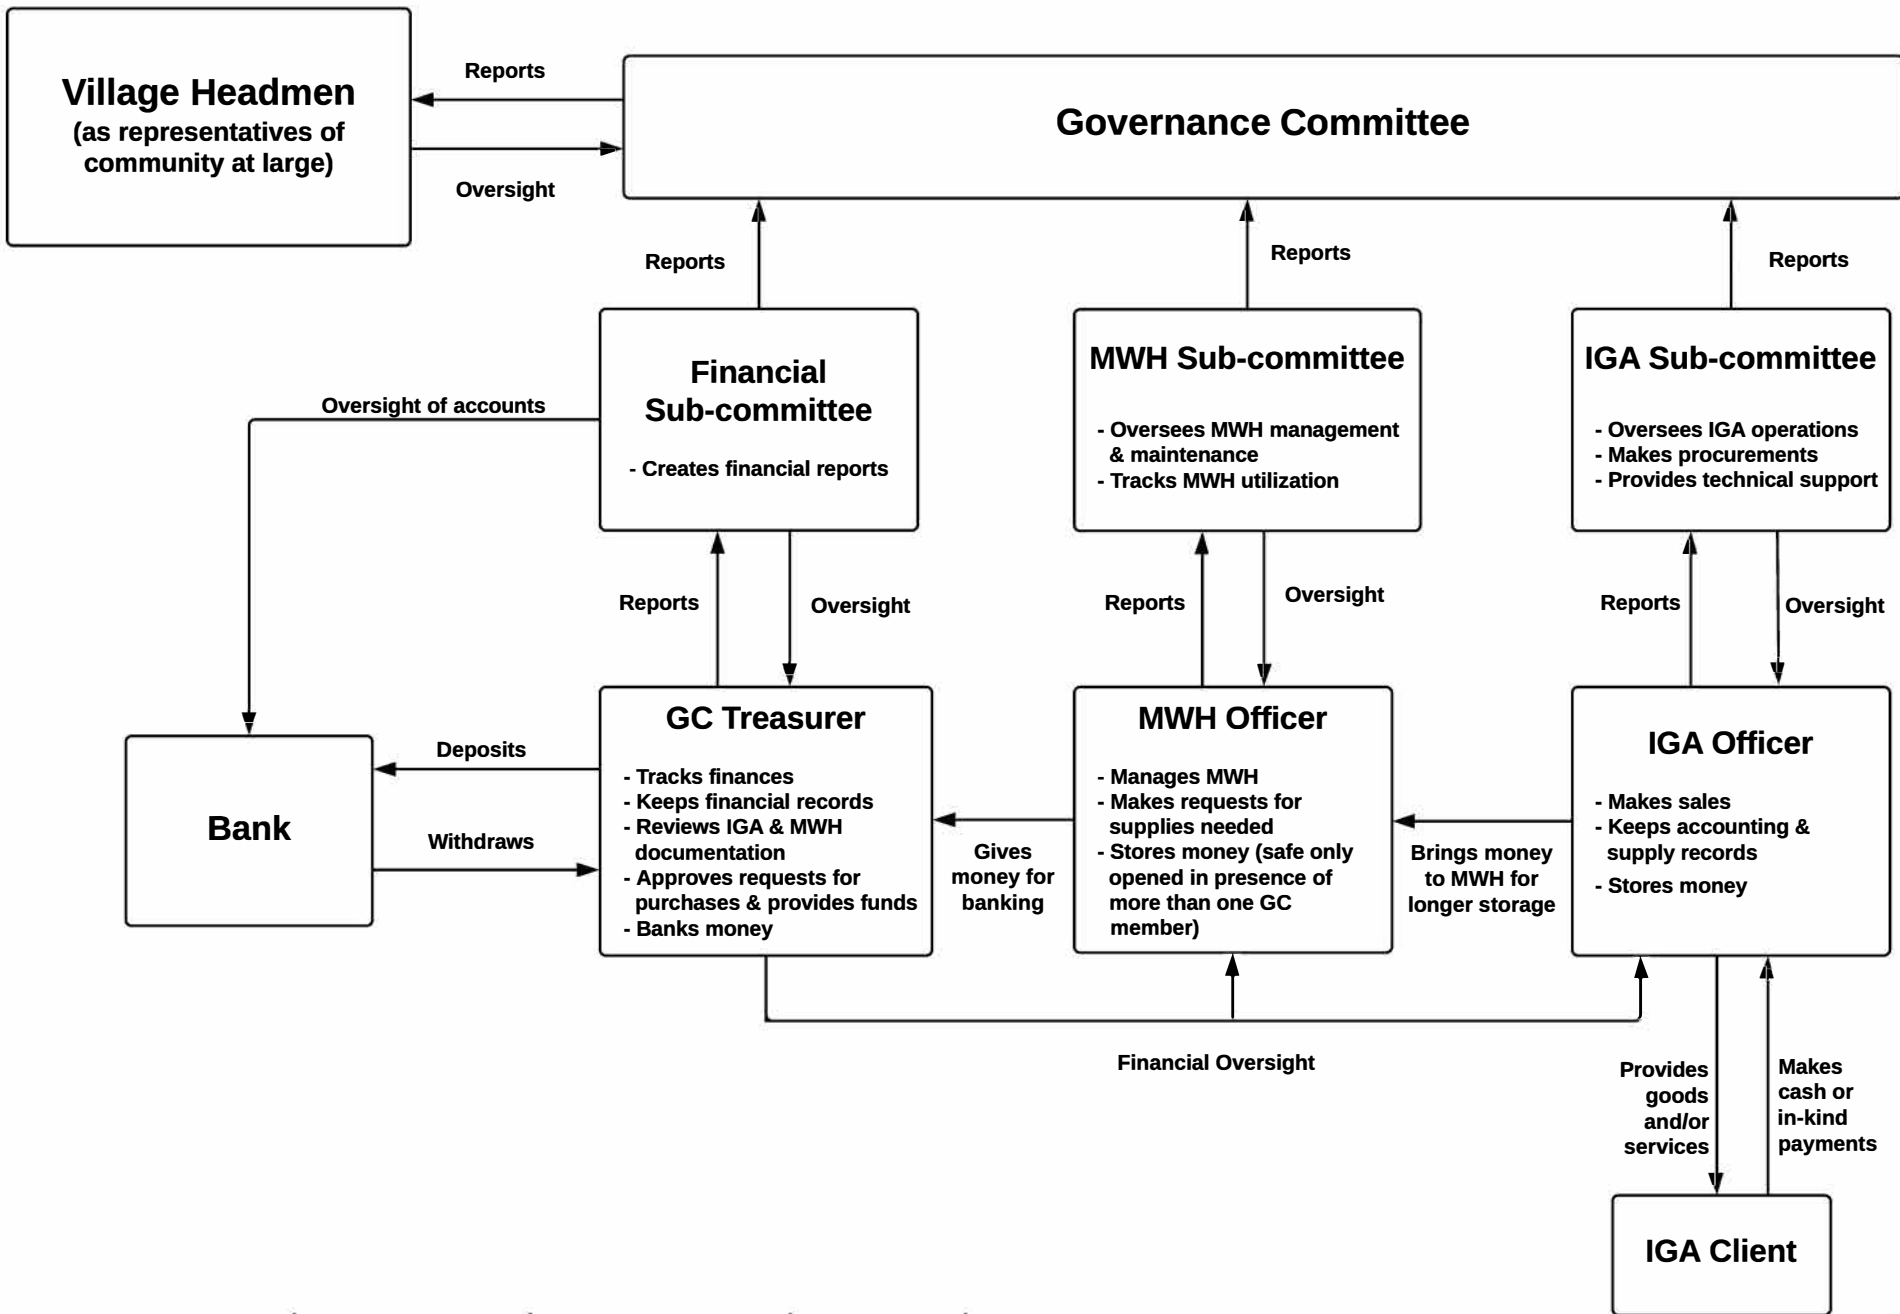

GC = governance committee; MWH = maternity waiting home, IGA = income generating activity
